# Supplementary material for: Hybrid Models and Biological Model Reduction with PyDSTool
Source: PubMed Central journal article supplement (PMC3415397; doi:10.1371/journal.pcbi.1002628), 2012-08-09
Supplement: pcbi.1002628.s002.pdf [file pcbi.1002628.s002.pdf]

## Supplemental Text 2: Code for PyDSTool/tests/IF\_squarespike\_model.py

```
"""Library function to build Integrate and fire model with square-pulse  
spike, as a hybrid system.
```

```
    Robert Clewley, March 2005.  
"""
```

```
from PyDSTool import *  
from time import clock
```

```
# -----  
  
def makeLinearLeak(name, rhs, par_args, inputs, evtol=None):  
    rhs_full = {'v': "(Iapp-gl*(v-vl))/C",  
                'excited': "0"}  
    if rhs is not None:  
        assert isinstance(rhs, dict)  
        rhs_full.update(rhs)  
    # testaux demonstrates a simple auxiliary variable using the global  
    # independent variable built-in function  
    rhs_full['testaux'] = "globalindepvar(t)-50"  
    for parname in ['threshval', 'vl', 'gl', 'Iapp', 'C']:  
        assert parname in par_args, "Essentialparsmissing"  
    if evtol is None:  
        evtol = 1e-3  
    DS_event_args = {'name': 'threshold',  
                    'eventtol': evtol,  
                    'eventdelay': evtol*0.1,  
                    'starttime': 0,  
                    'term': True  
                    }  
    thresh_ev = Events.makeZeroCrossEvent('v-threshval', 1,  
                                         DS_event_args,  
                                         varnames=['v'],  
                                         parnames=['threshval'])  
  
    DS_args = {'pars': par_args,  
              'varspecs': rhs_full,  
              'auxvars': 'testaux',  
              'xdomain': {'v': [-120,50], 'excited': 0.},
```

```

        'ics': {'v': -80, 'excited': 0},
        'tdomain': [0, Inf],
        'alparams': {'init_step': 0.1},
        'events': thresh_ev,
        'name': name}

if inputs != {}:
    DS_args['inputs'] = inputs

return embed(Generator.Vode_ODEsystem(DS_args), name=name, tdata=[0,200])

def makeSpike(name, par_args):
    # spike length parameter 'splen' must be contained within 'tdomain' in
    # order to get a fully-formed square-pulse 'spike'
    DS_spike_args = {'tdomain': [0.0, 1.5],
                    'varspecs': {'v': "if(t<splen,48,-97)", 'excited': "1",
                                'testaux': "globalindepvar(t)-50"},
                    'auxvars': 'testaux',
                    'ics': {'v': 48, 'excited': 1},
                    'pars': {'splen': par_args['splen']},
                    'xdomain': {'v': [-98, 51], 'excited': 1.},
                    'name': name}
    return embed(Generator.ExplicitFnGen(DS_spike_args), name=name)

def makeIFneuron(name, par_args_linear, par_args_spike, rhs=None, inputs={},
                icdict=None, evtol=None):
    allDSnames = ['linear', 'spike']

    # get models
    DS_linear = makeLinearLeak('linear', rhs, par_args_linear,
                              inputs, evtol=evtol)
    DS_spike = makeSpike('spike', par_args_spike)

    # make model interfaces
    DS_linear_MI = intModelInterface(DS_linear)
    DS_spike_MI = intModelInterface(DS_spike)

    DS_linear_info = makeModelInfoEntry(DS_linear_MI, allDSnames,
                                        [('threshold', 'spike')])
    DS_spike_info = makeModelInfoEntry(DS_spike_MI, allDSnames,
                                       [('time', 'linear')])
    modelInfoDict = makeModelInfo([DS_linear_info, DS_spike_info])

    # 'excited' is an indicator variable of the model, and is used to
    # ensure that the compute() method can determine which DS
    # to start the calculation with
    mod_args = {'name': name,
                'modelInfo': modelInfoDict}
    if icdict is not None:
        mod_args['ics'] = icdict.copy()

```

```

IFmodel = Model.HybridModel(mod_args)
return IFmodel

# -----

if __name__=='__main__':
    # need the __main__ to use above functions as imports for other
    # scripts without running this part
    print '-----IFmodeltest1'

    par_args_linear = {'Iapp': 1.3, 'gl': 0.1, 'vl': -67,
                       'threshval': -65, 'C': 1}
    par_args_spike = {'splen': 0.75}

    IFmodel = makeIFneuron('IF_fit', par_args_linear, par_args_spike)
    icdict = {'v': -80, 'excited': 0}

    start = clock()
    print 'Computing trajectory...'
    IFmodel.compute(trajname='onespike',
                   tdata=[0, 60],
                   ics=icdict,
                   verboselevel=0)
    print '\n...finished in %.3f seconds.\n' % (clock()-start)

    IFmodel.set(pars={'Iapp': 1.0, 'threshval': -60})
    print 'Recomputing trajectory with new params...'
    IFmodel.compute(trajname='twospike',
                   tdata=[0, 60],
                   ics=icdict)

    print 'Preparing plot'
    plotData = IFmodel.sample('onespike', dt=0.05)
    plotData2 = IFmodel.sample('twospike', ['v', 'testaux'], 0.05)
    plt.ylabel('v, testaux')
    plt.xlabel('t')
    vline = plt.plot(plotData['t'], plotData['v'])
    vline2 = plt.plot(plotData2['t'], plotData2['v'])
    aline = plt.plot(plotData['t'], plotData['testaux'])

    print "\nLast point of hybrid trajectory:"
    print "IFmodel.getEndPoint('onespike')-->\n", \
          IFmodel.getEndPoint('onespike')

    print "\nFirst point of hybrid trajectory:"
    print "IFmodel.getEndPoint('onespike', 0)-->\n", \
          IFmodel.getEndPoint('onespike', 0)

    print "Testing IF hybrid model as mapping..."

```

```

num_parts = len(IFmodel.getTrajTimePartitions('twospike'))
#eventvals = IFmodel('onespike', range(0, num_parts+1), asmap=True)
eventvals = IFmodel('twospike', range(0, num_parts+1), asmap=True)
for i in range(0, num_parts+1):
    print "(v,t) at event(%i) = (%.4f, %.4f)" % (i, eventvals(i)('v'),
                                                eventvals(i)('t'))

print "\nAlternative access to explicit event info using" + \
      "getTrajEvents(trajname) method:\n"
evs = IFmodel.getTrajEvents('twospike')
evtimes = IFmodel.getTrajEventTimes('onespike')
print evs
assert len(evs['threshold']) == 2, "Problem with hybrid events"
assert len(evtimes['threshold']) == 4, "Problem with hybrid events"
assert allclose(evtimes['threshold'][3], 54.009, 1e-3), \
      "Problem with hybrid events"
assert allclose(evs['threshold'][1]['v'], -60, 1e-3), \
      "Problem with hybrid events"

print "\nDepending on your platform and pylab configuration you may need"
print "to execute the plt.show() command to see the plots"
# plt.show()

```
